# Supplementary material for: One-pot green hydrothermal synthesis of fluorescent nitrogen-doped carbon nanodots for in vivo bioimaging
Source: Springer Nature journal article supplement (doi:10.1007/s00216-015-9138-8), 2015-10-29
Supplement: 216_2015_9138_MOESM1_ESM.pdf [file 216_2015_9138_MOESM1_ESM.pdf]

## One-pot green hydrothermal synthesis of fluorescent nitrogen-doped carbon nanodots for *in vivo* bioimaging

Tsung-Rong Kuo, Shuo-Yuan Sung, Chun-Wei Hsu, Chih-Jui Chang, Tai-Chia Chiu,  
Cho-Chun Hu

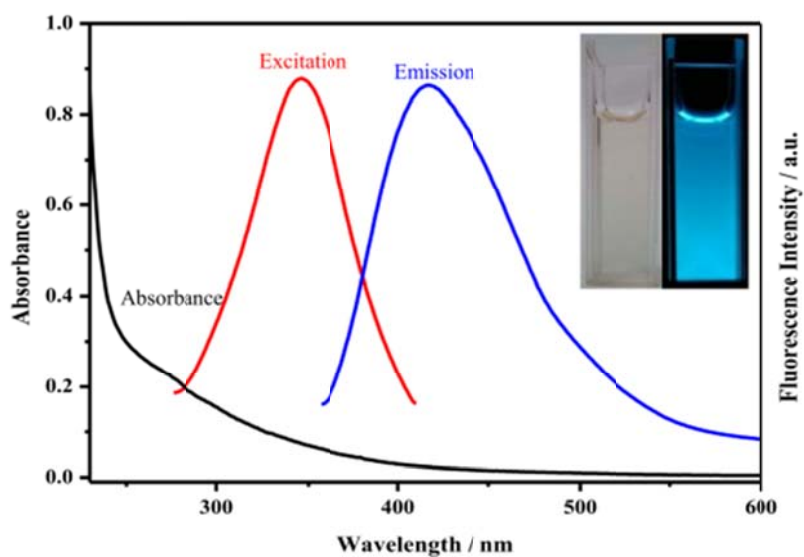

**Fig. S1.** The UV-vis absorption spectrum and fluorescence spectra of the CNDs. Inset: photographs taken under white light (left) and 365 nm UV light (right)

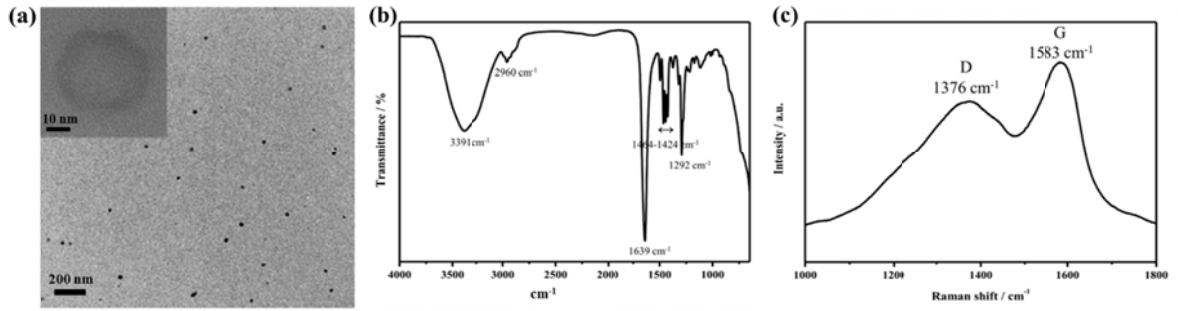

**Fig. S2.** (a) TEM images of CNDs (inset: the high resolution TEM image of CNDs).

(b) Fourier transformed infrared spectra of CNDs. (c) Raman spectra of CNDs

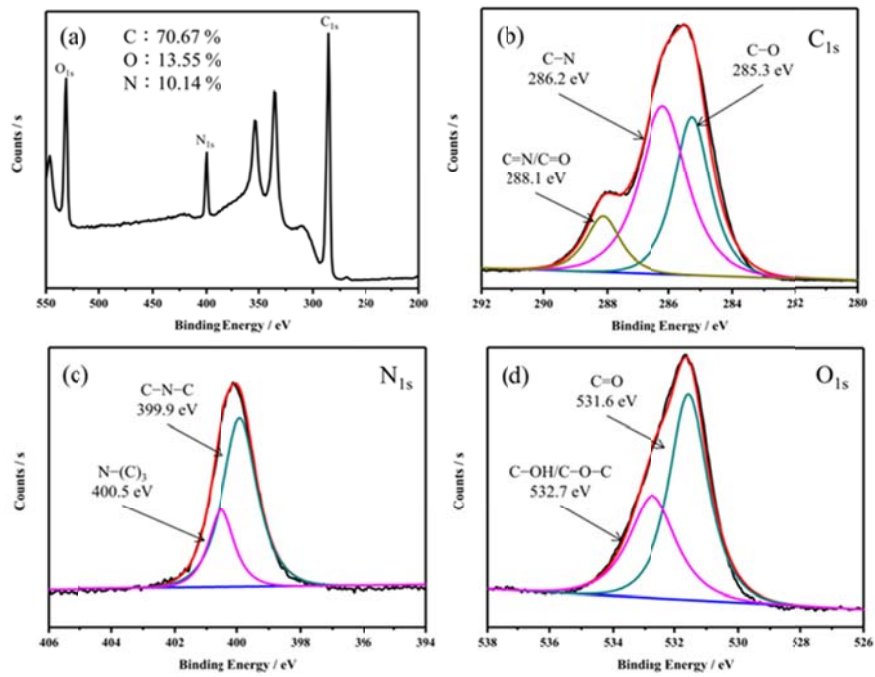

**Fig. S3.** (a) XPS survey spectrum of the CNDs. XPS (b)  $C_{1s}$ , (c)  $N_{1s}$  and (d)  $O_{1s}$

spectra of the CNDs

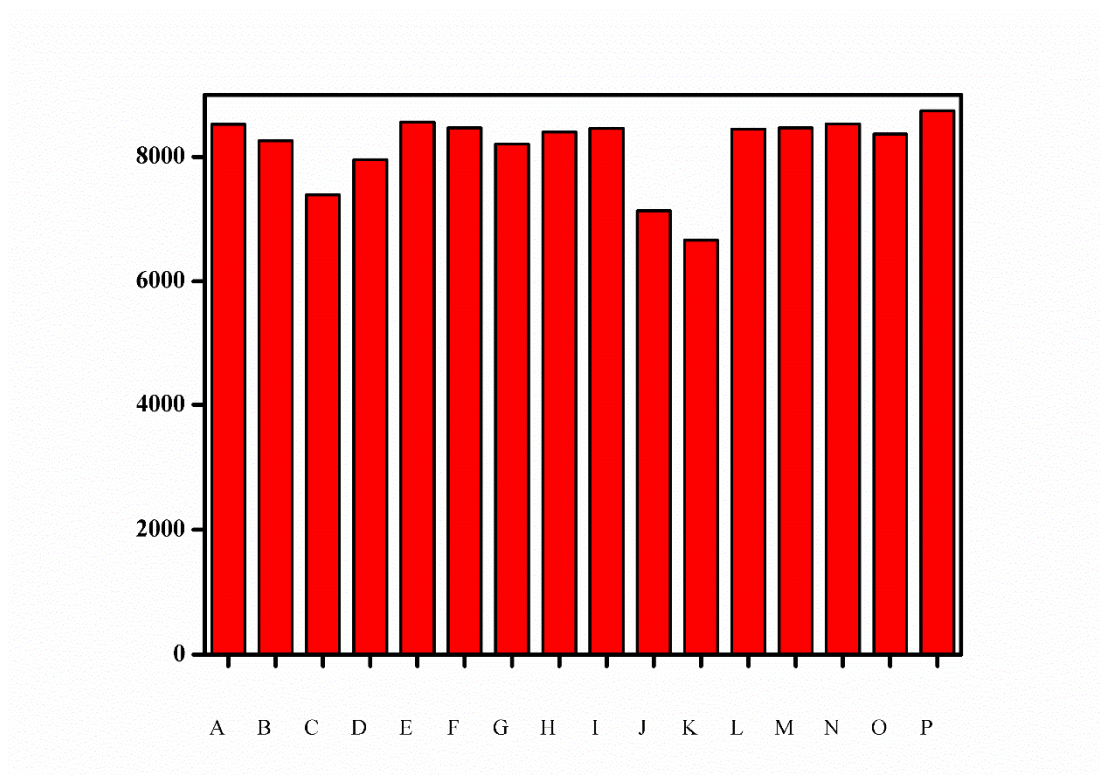

**Fig. S4.** Fluorescence responses of the CNDs aqueous solution in the presence of different metal ions (Excitation wavelength: 360 nm). A: blank, B: Ca<sup>2+</sup>, C: Hg<sup>2+</sup>, D: Pb<sup>2+</sup>, E: Ag<sup>2+</sup>, F: Al<sup>3+</sup>, G: Ba<sup>2+</sup>, H: Ca<sup>2+</sup>, I: Co<sup>2+</sup>, J: Fe<sup>2+</sup>, K: Fe<sup>3+</sup>, L: K<sup>+</sup>, M: Li<sup>+</sup>, N: Mg<sup>2+</sup>, O: Mn<sup>2+</sup>, P: Zn<sup>2+</sup>

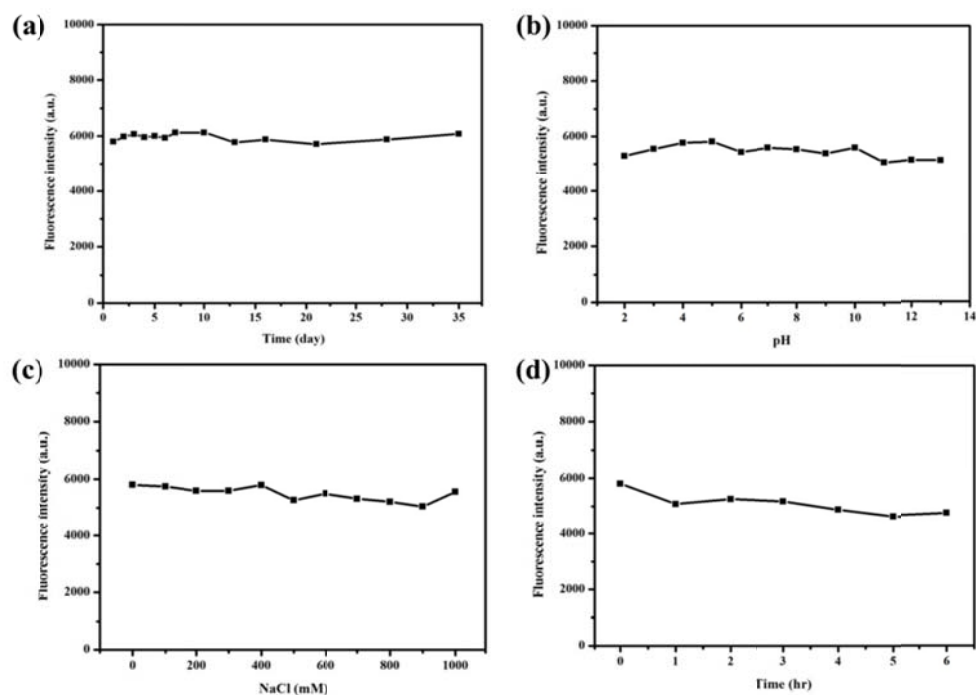

**Fig. S5.** The changes of fluorescence intensity of CNDs solution. (a) Within 35 days under 4 °C condition (b) at various pH value (c) in various ionic strengths (d) under the UV irradiation

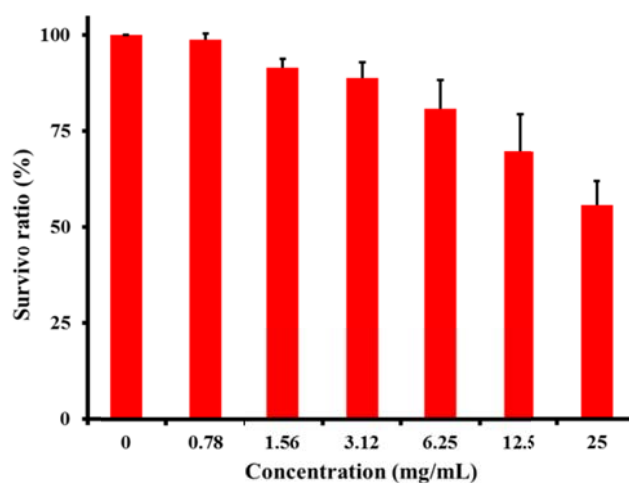

**Fig. S6.** The cytotoxicity evaluated by MTT assay in the range of 0.78~25 mg/mL of the CNDs. The Hela cells were incubated with the CNDs solution for 24 h

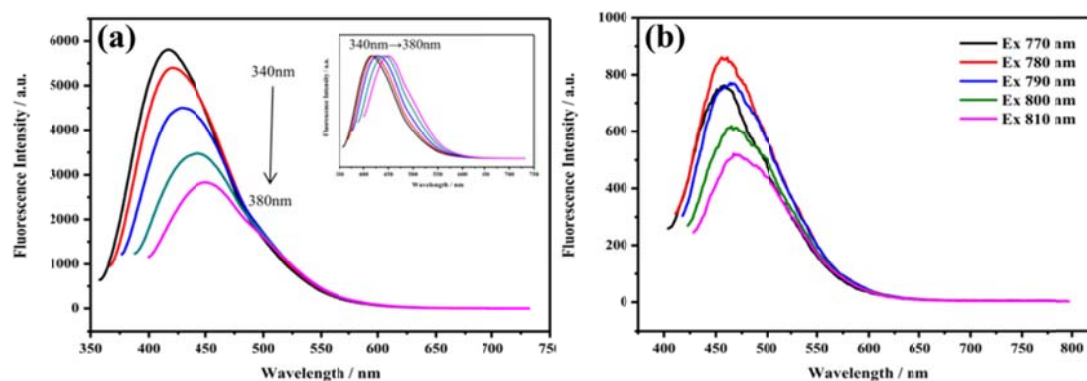

**Fig. S7.** (a) Emission spectra of the CNDs recorded for progressively longer excitation wavelengths with 10 nm increments from 340 nm to 380 nm. Inset: The normalized PL emission spectra. (b) The up-conversion photoluminescence spectra of the CNDs at different excitation wavelengths as indicated

**Table S1.** The quantum yields of carbon nanodots from different start materials

| Experiments | Different Start Materials |                   | Quantum Yields (%) |
|-------------|---------------------------|-------------------|--------------------|
| <b>A</b>    | PVP, 1g                   | Glycine, 0 g      | 14.52              |
| <b>B</b>    | PVP, 1g                   | Glycine, 0.0563 g | 21.19              |
| <b>C</b>    | PVP, 1g                   | Glycine, 0.1126 g | 21.43              |
| <b>D</b>    | PVP, 1g                   | Glycine, 0.2252 g | 16.75              |
| <b>E</b>    | PVP, 1g                   | Glycine, 0.5630 g | 15.39              |
